# Supplementary material for: Repetitive head impacts induce neuronal loss and neuroinflammation in young athletes
Source: PubMed Central journal article supplement (PMC10996668; doi:10.1101/2024.03.26.586815), 2024-03-28

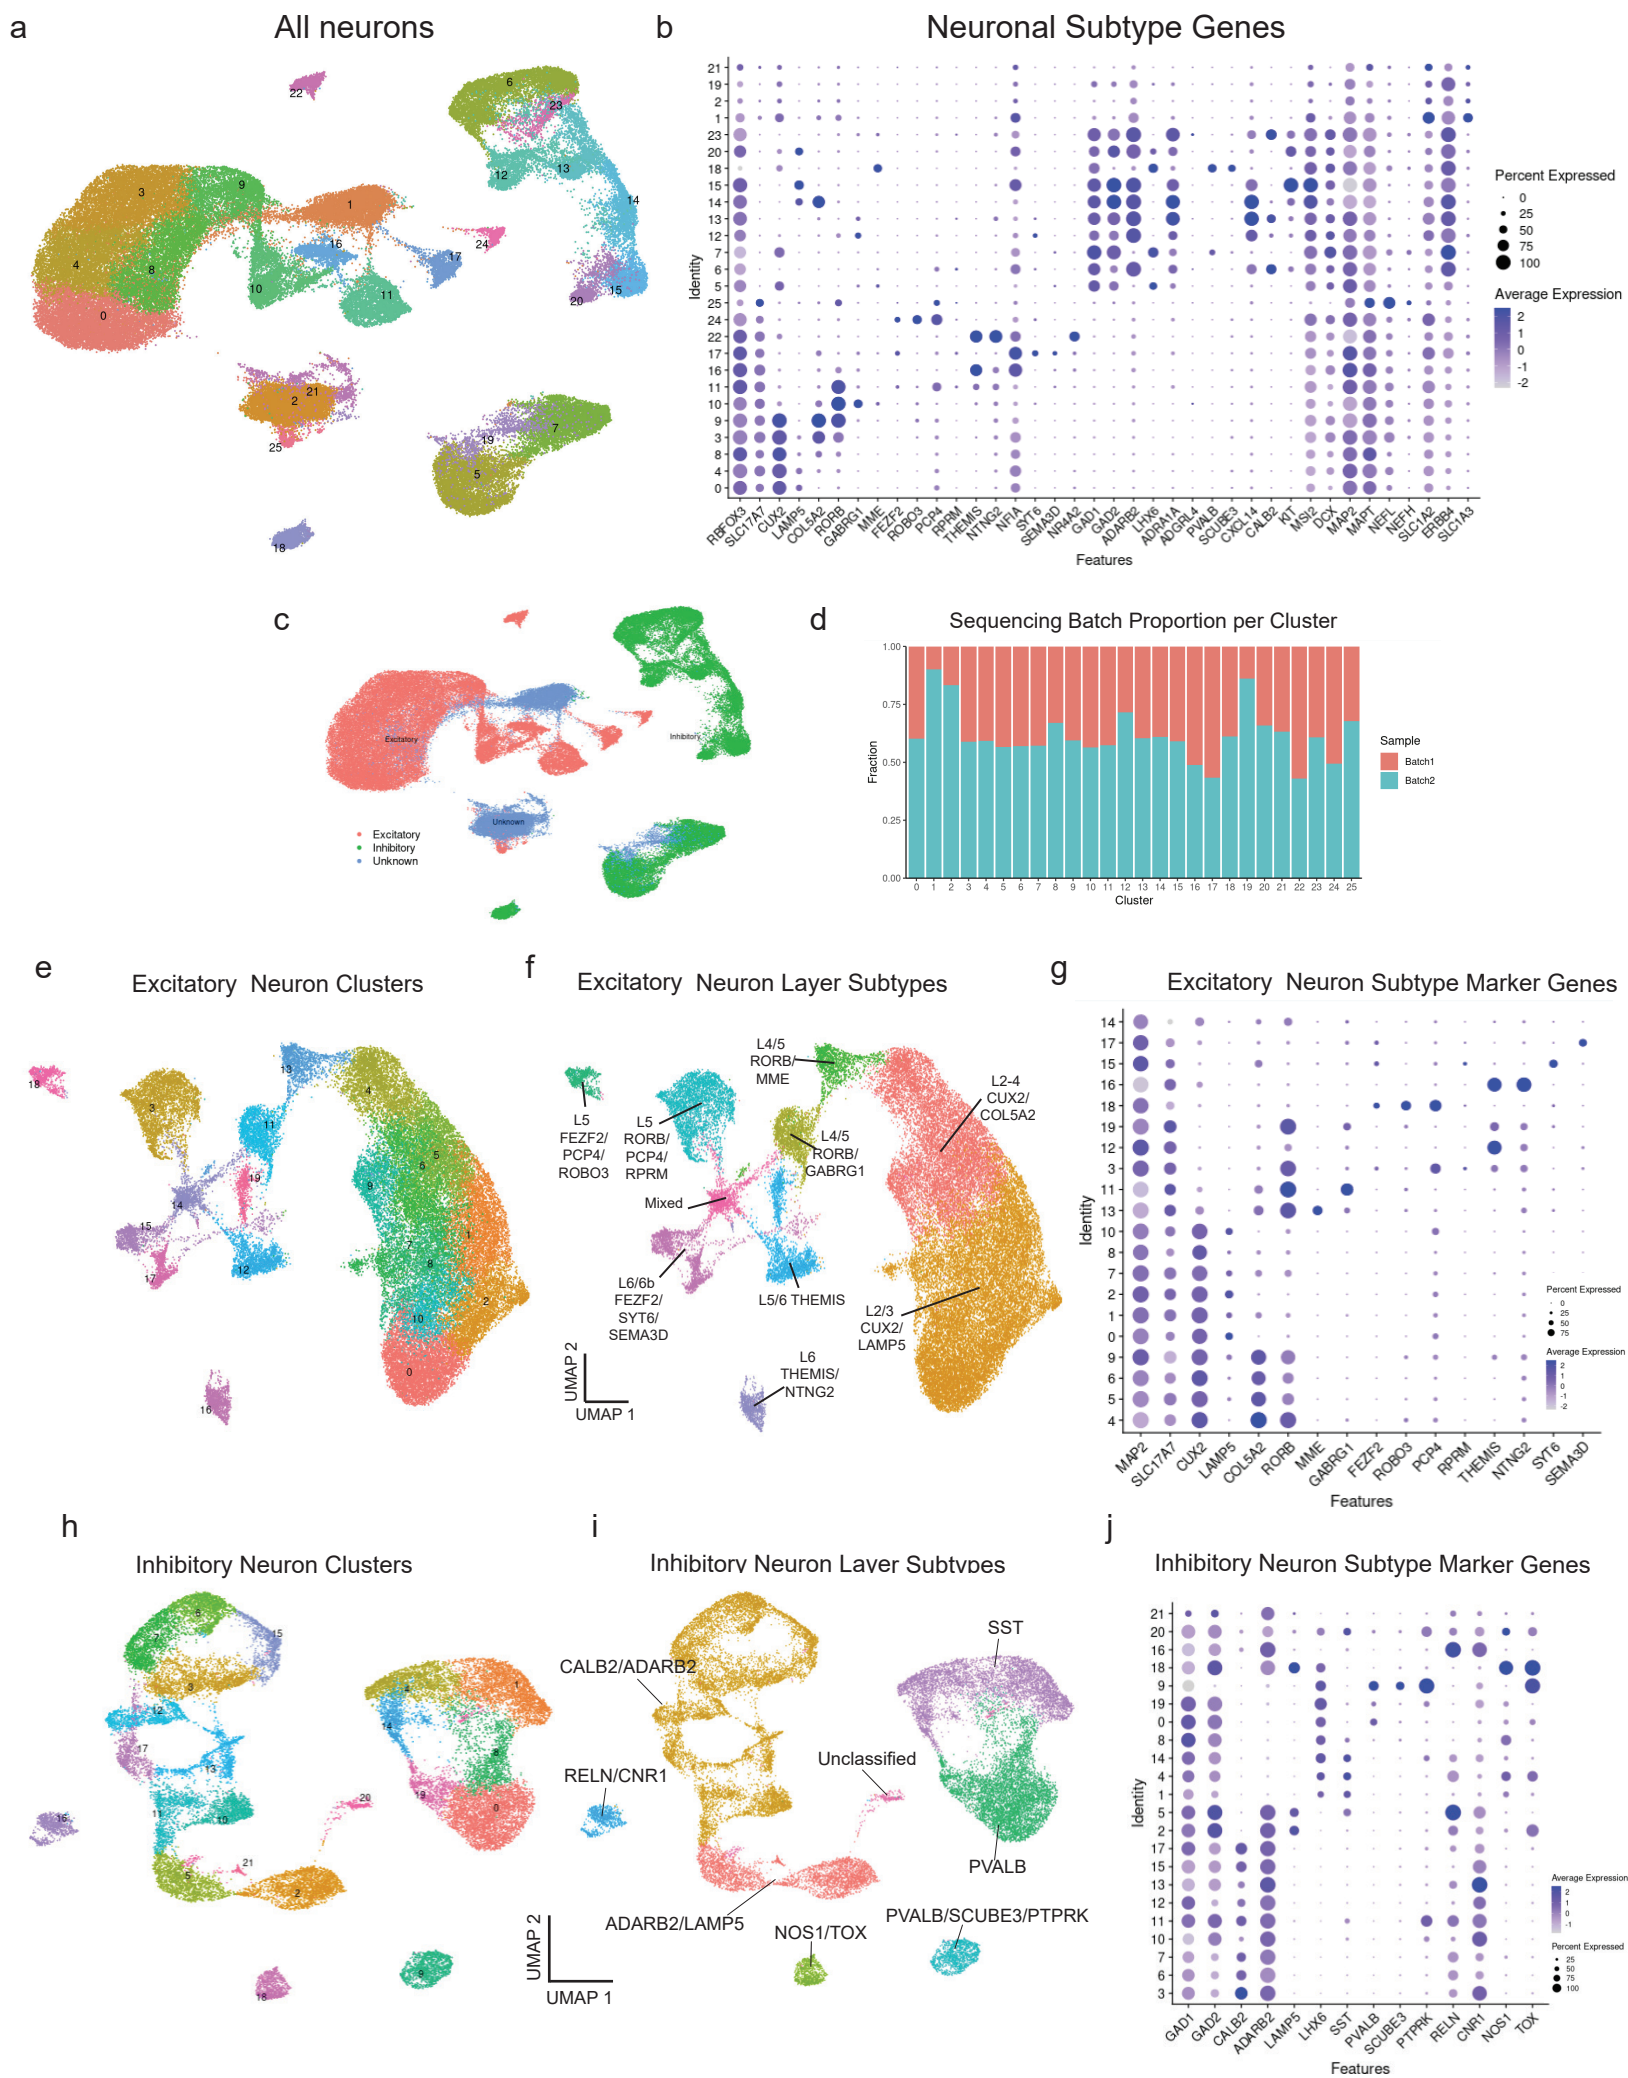

Supplement: media-2.pdf [file media-2.pdf]
